# Supplementary material
Source: PubMed Central journal article supplement (PMC3646866)
Supplement: cc-12-1105-s01.pdf [file cc-12-1105-s01.pdf]

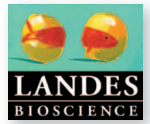

## **Supplemental Material to:**

**Stela S. Palii, Yuxia Cui, Cynthia L. Innes  
and Richard S. Paules**

**Dissecting cellular responses to irradiation via targeted  
disruptions of the ATM-CHK1-pp2a circuit**

**2013; 12(7)**

**<http://dx.doi.org/10.4161/cc.24127>**

**<http://www.landesbioscience.com/journals/cc/article/24127>**

### Supplementary data for Figure 3.

Flow cytometry profiles for HEK-NS and HEK-CHK1A cell lines. G2 and mitotic time course.

Legend:

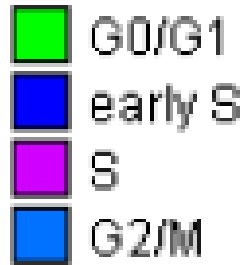

HEK NS 0 Gy 2 hr

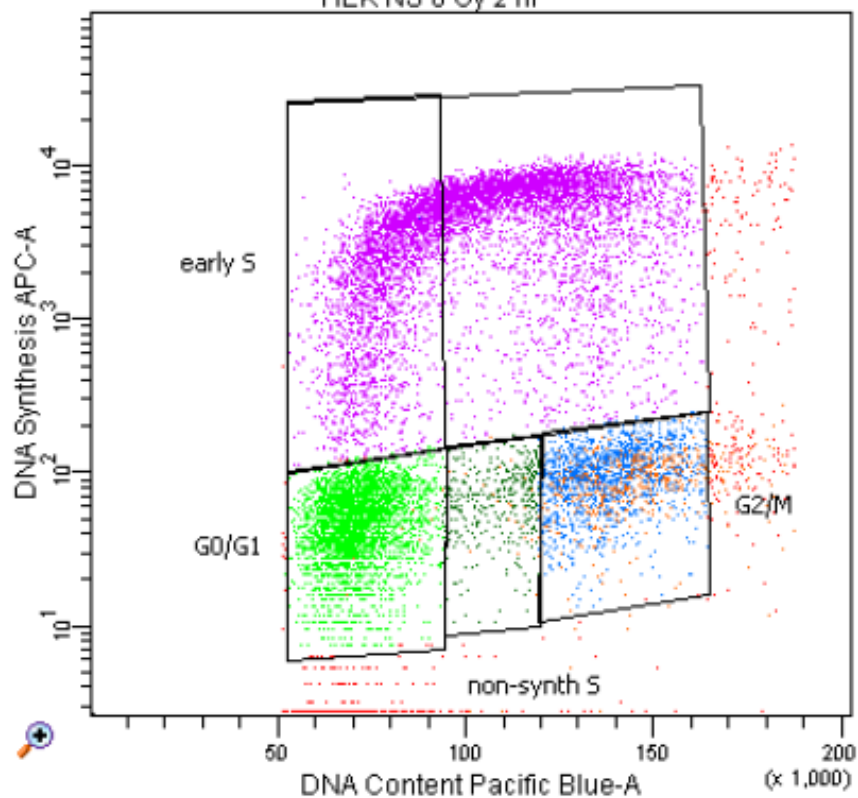

HEK NS 0 Gy 2 hr

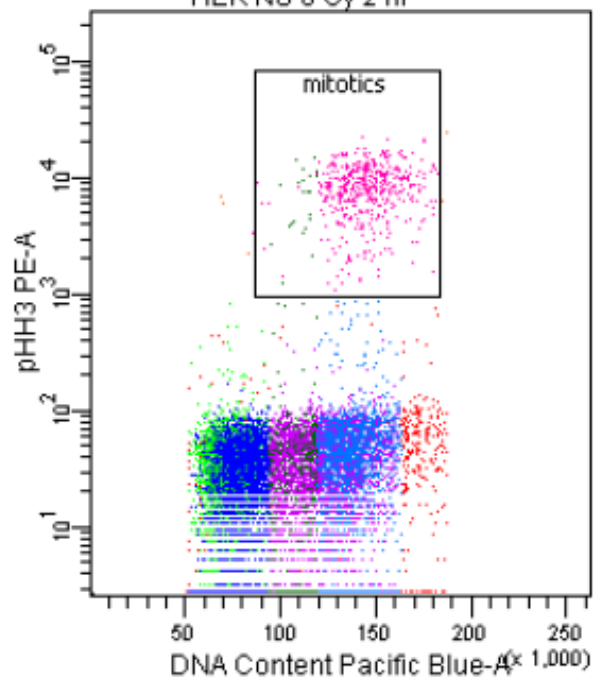

HEK NS 3 Gy 2 hr

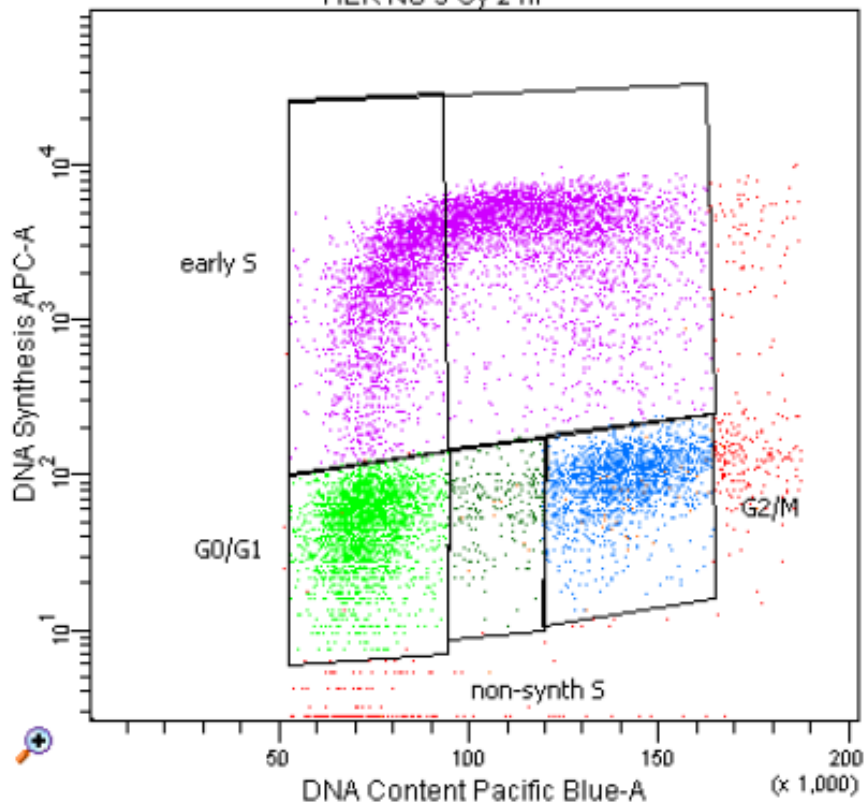

HEK NS 3 Gy 2 hr

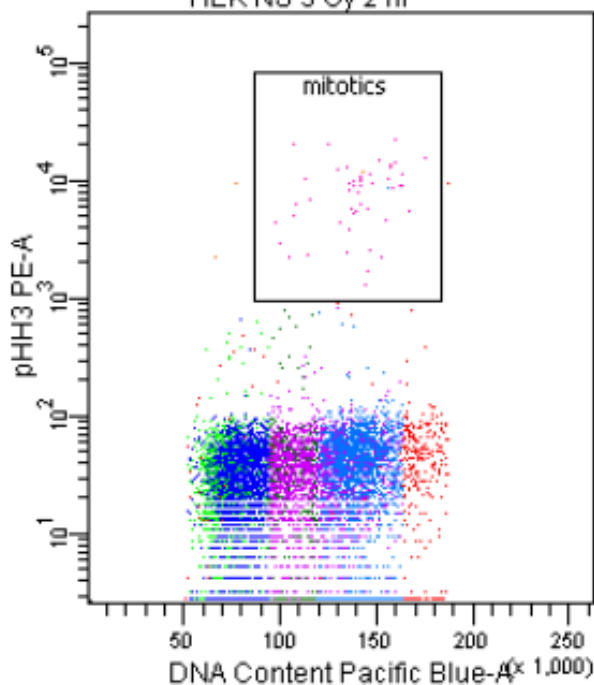

HEK CHK 0 Gy 2 hr

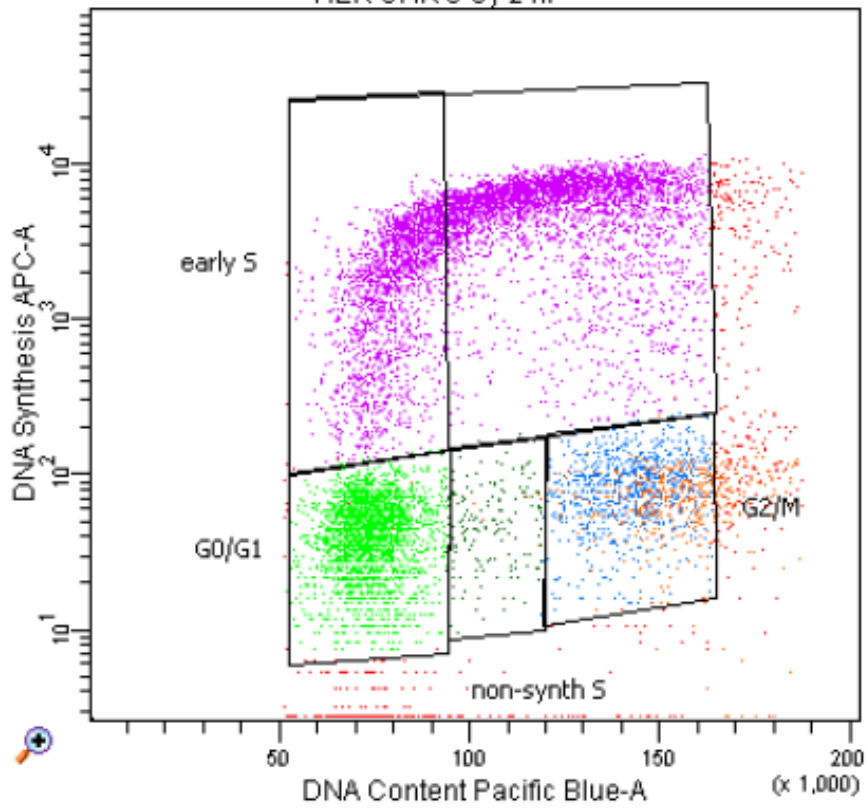

HEK CHK 0 Gy 2 hr

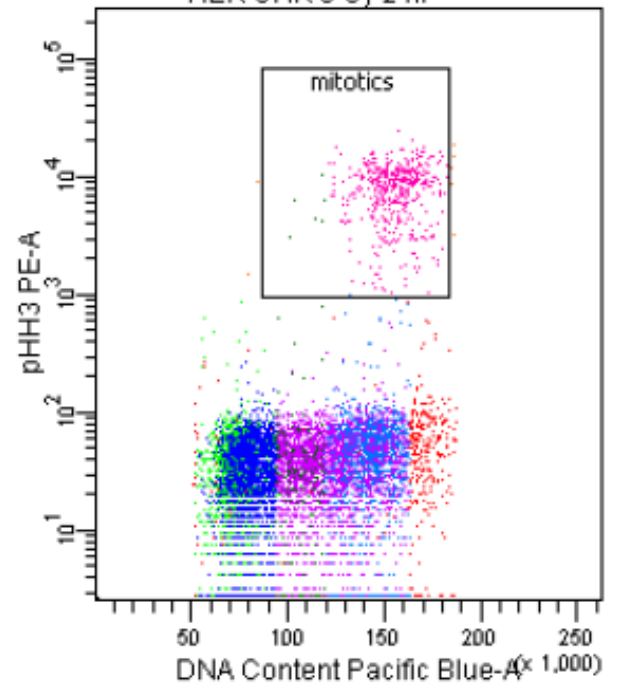

HEK CHK 3 Gy 2 hr

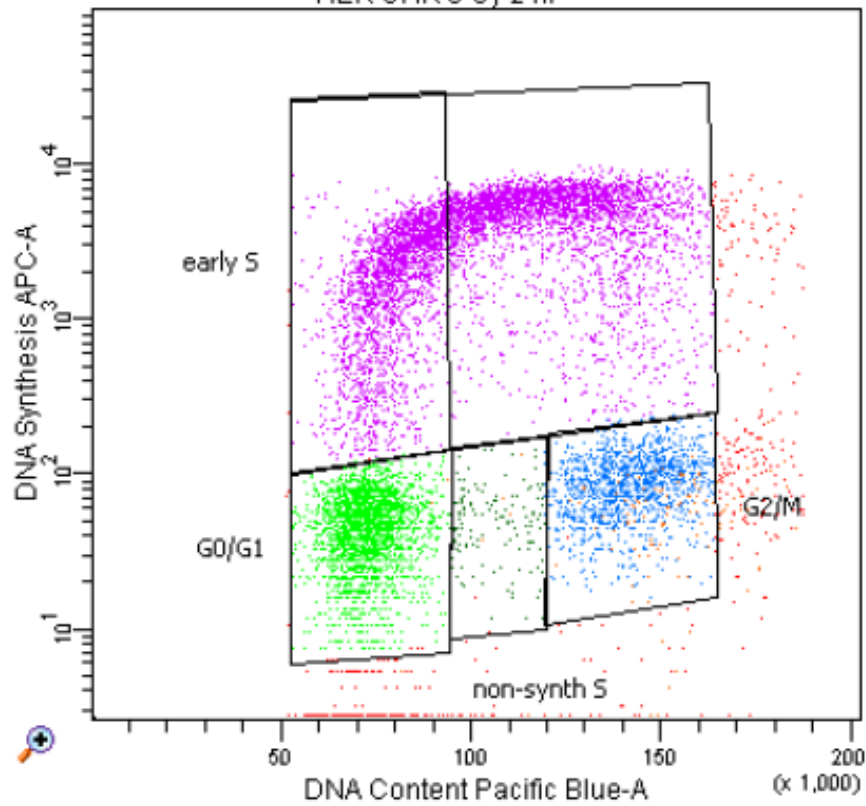

HEK CHK 3 Gy 2 hr

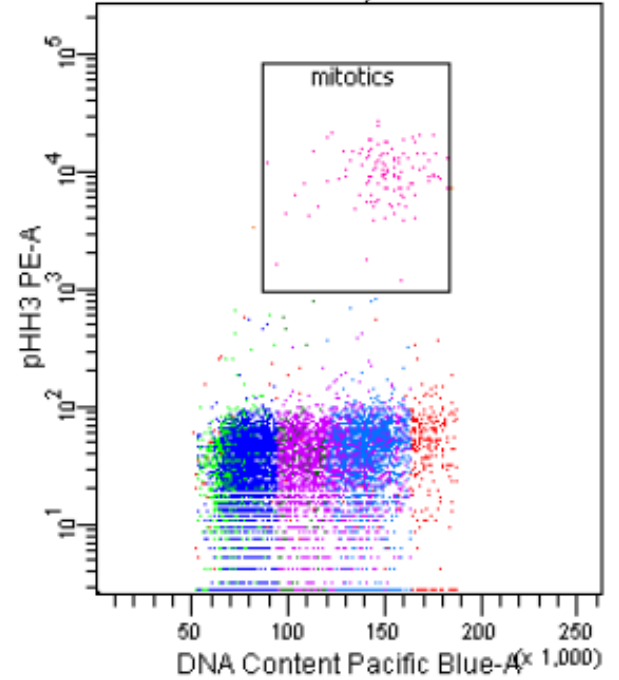

HEK NS 0 Gy 4 hr

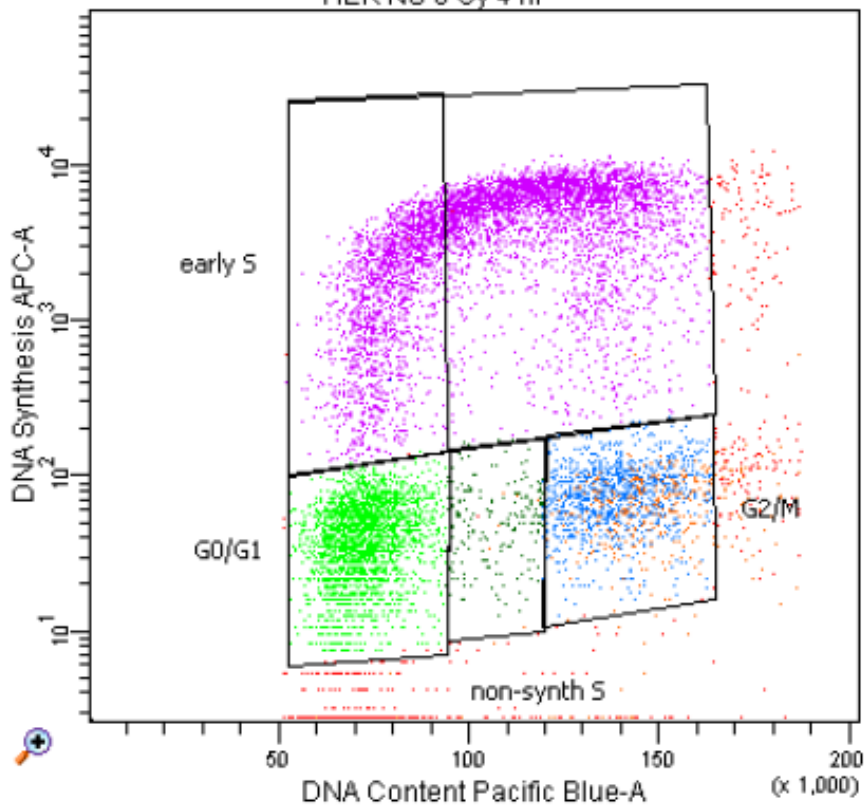

HEK NS 0 Gy 4 hr

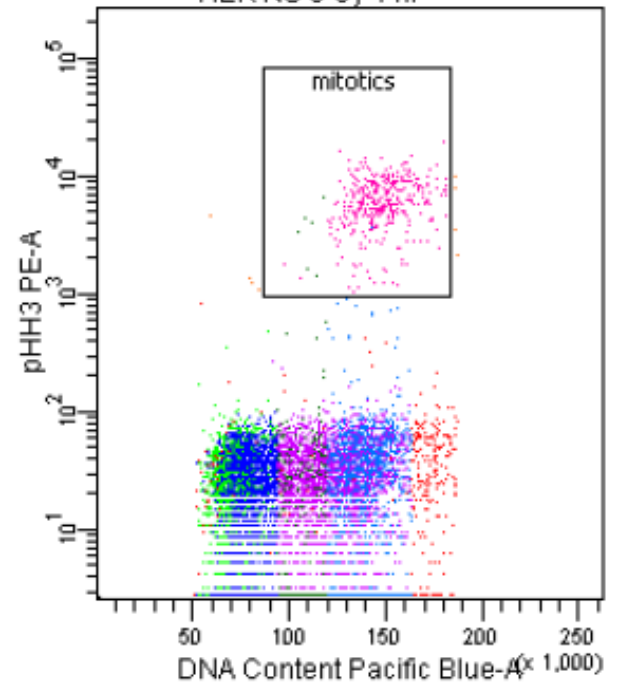

HEK NS 3 Gy 4 hr

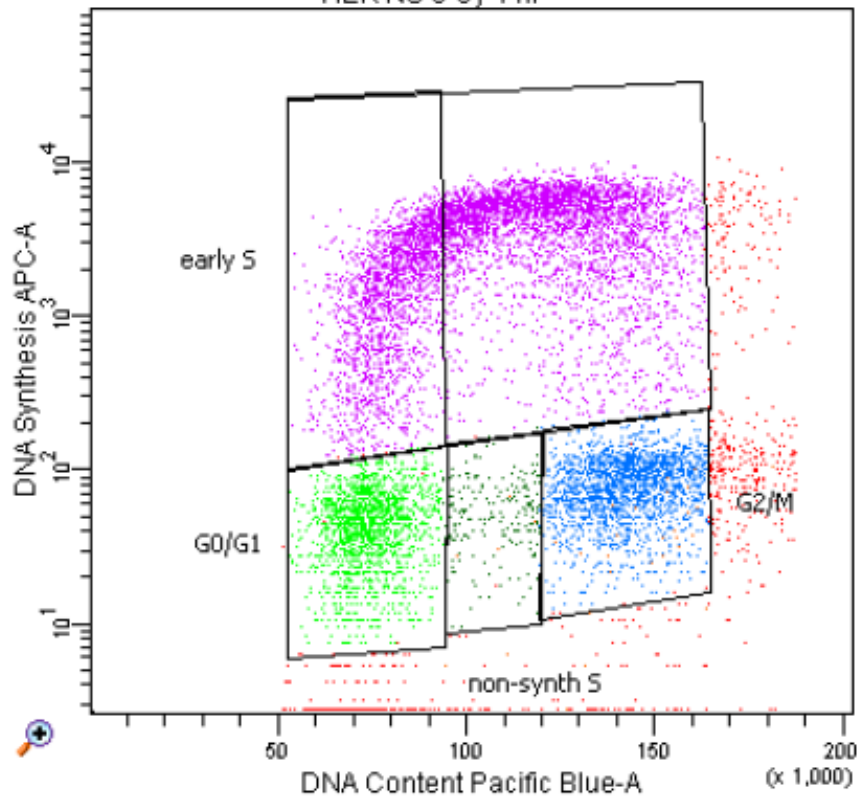

HEK NS 3 Gy 4 hr

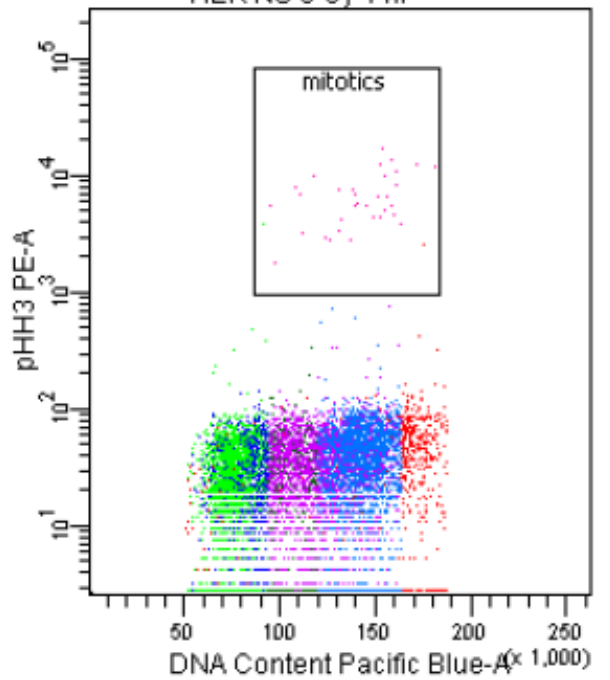

HEK CHK 0 Gy 4 hr

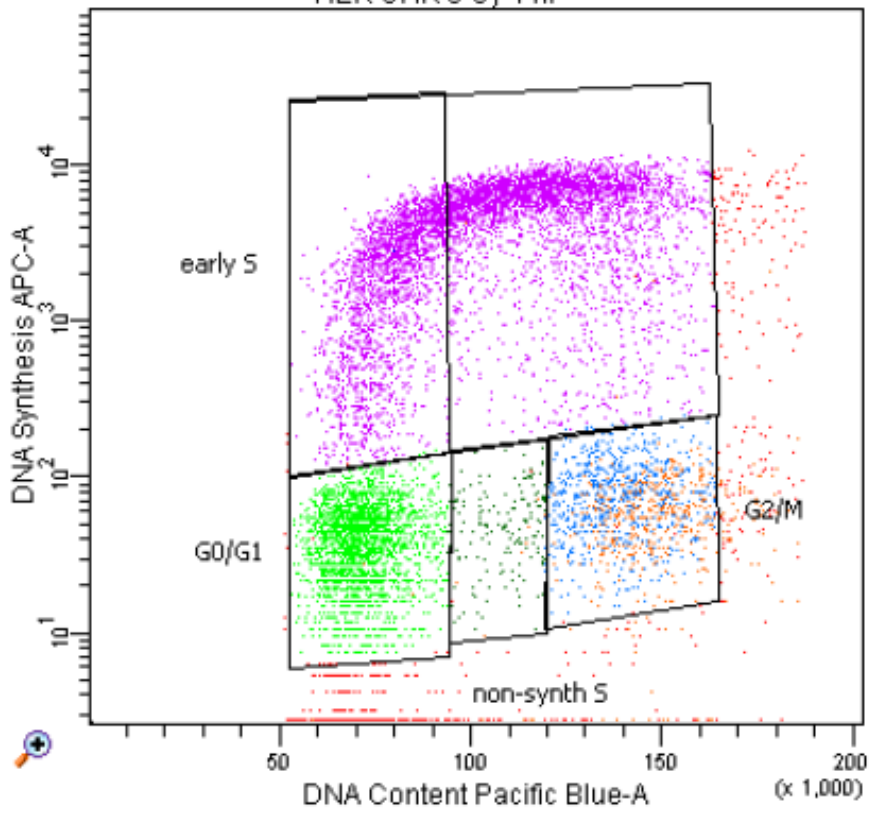

HEK CHK 0 Gy 4 hr

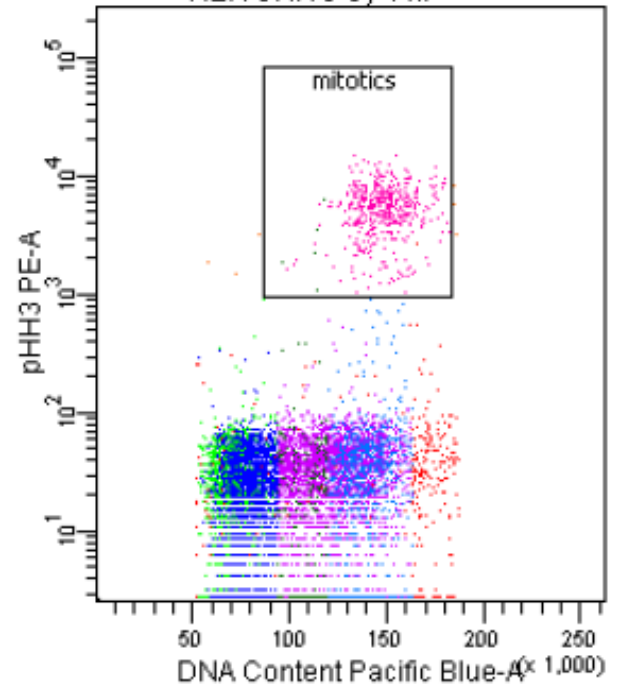

HEK CHK 3 Gy 4 hr

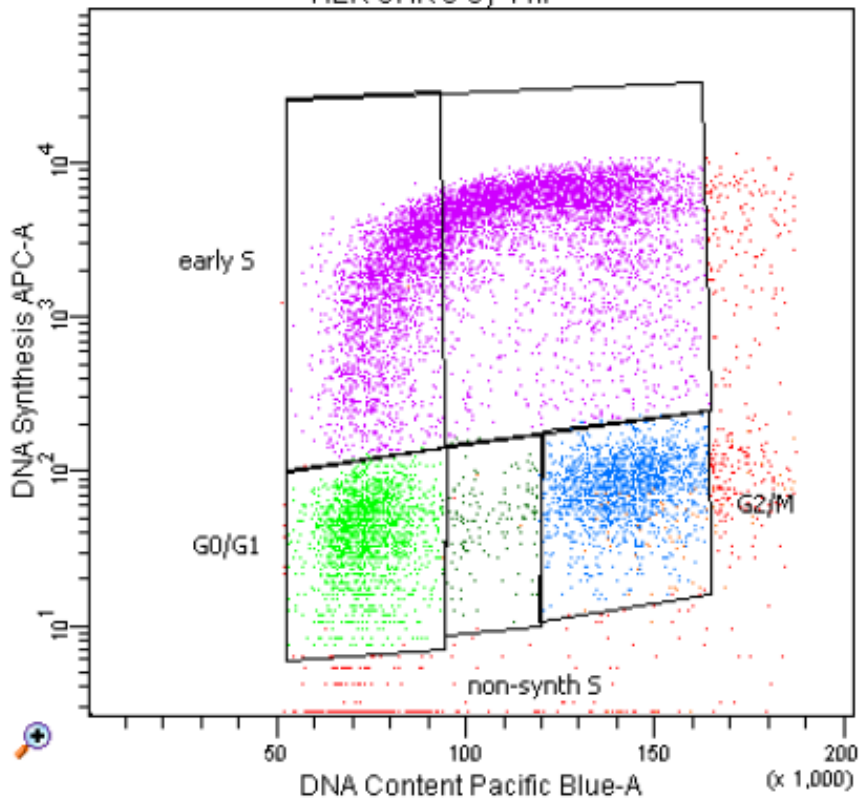

HEK CHK 3 Gy 4 hr

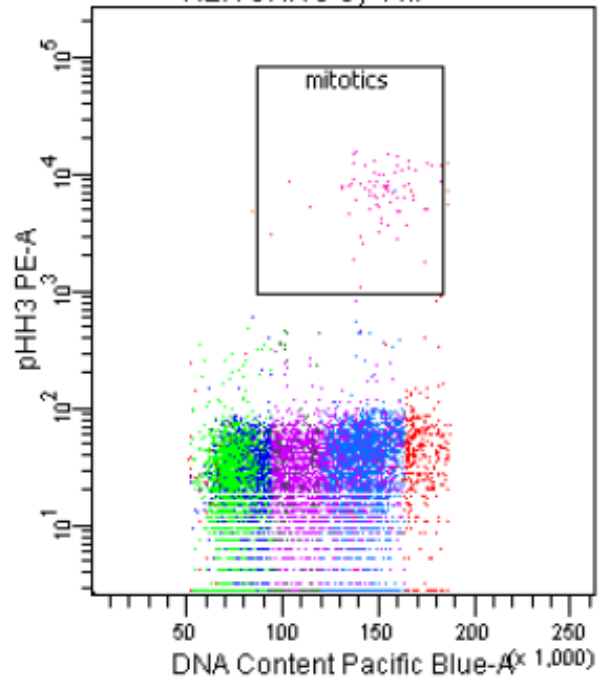



HEK NS 0 Gy 6 hr

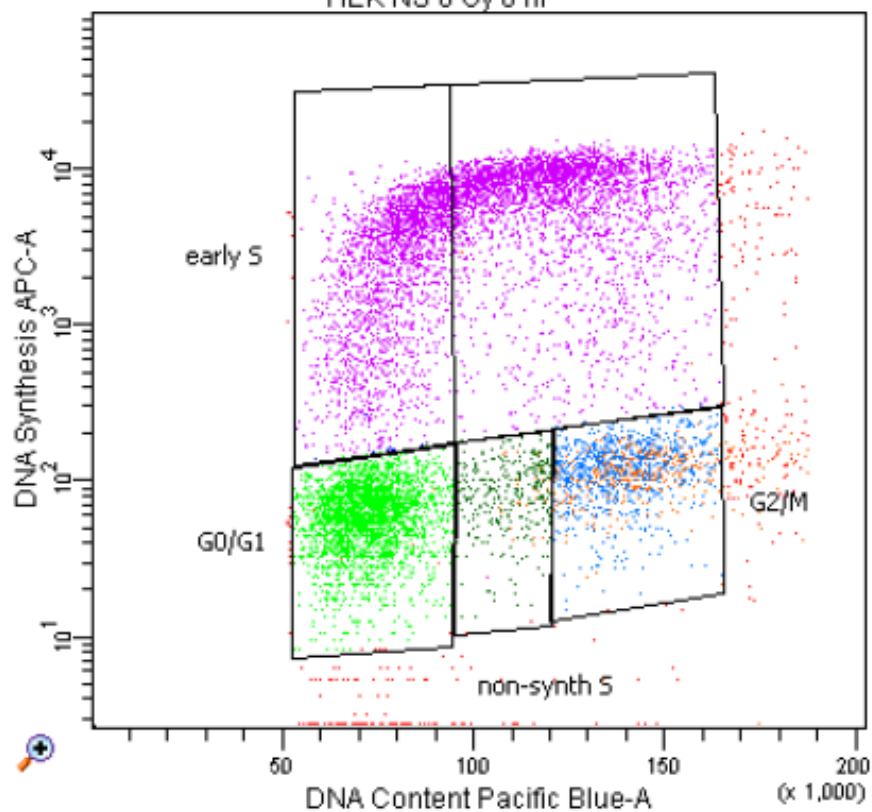

HEK NS 0 Gy 6 hr

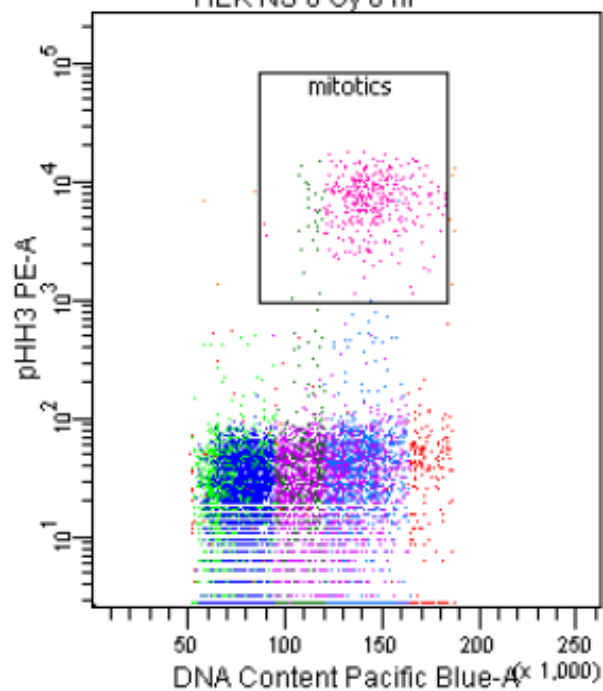

HEK NS 3 Gy 6 hr

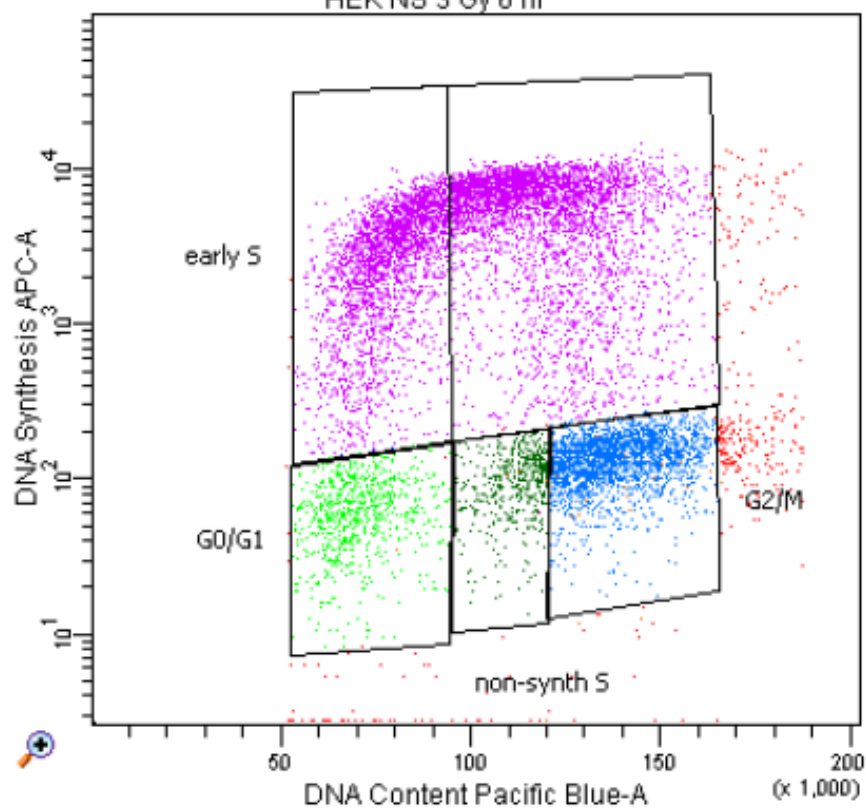

HEK NS 3 Gy 6 hr

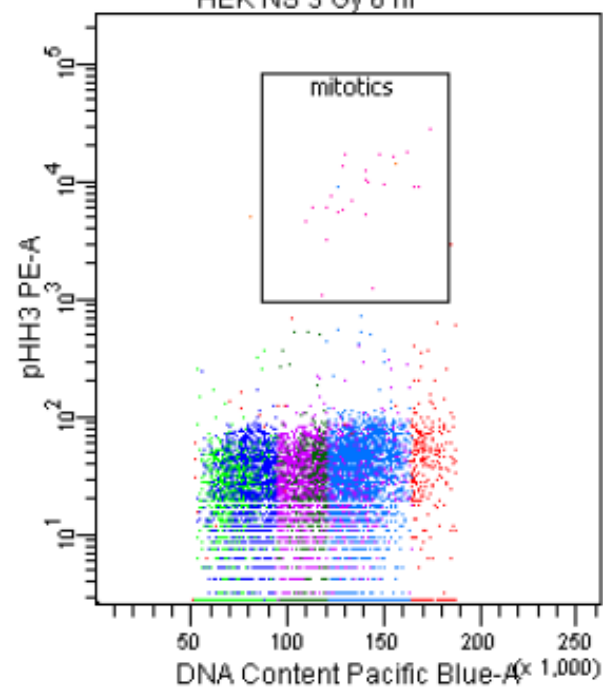

HEK CHK 0 Gy 6 hr

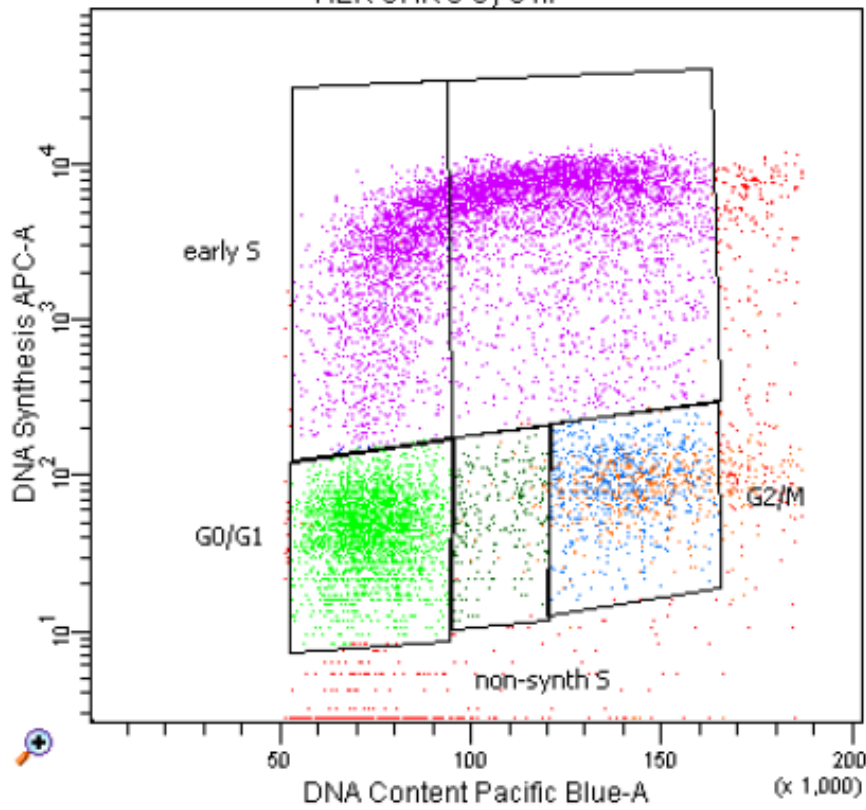

HEK CHK 0 Gy 6 hr

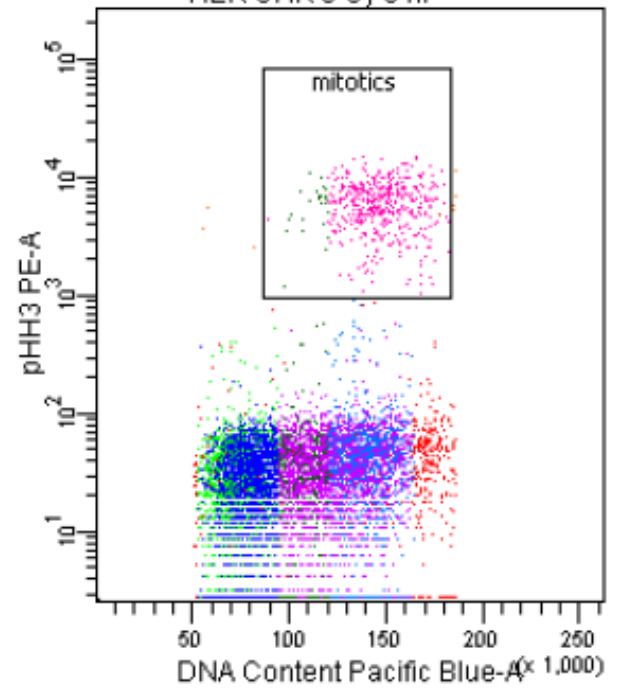

HEK CHK 3 Gy 6 hr

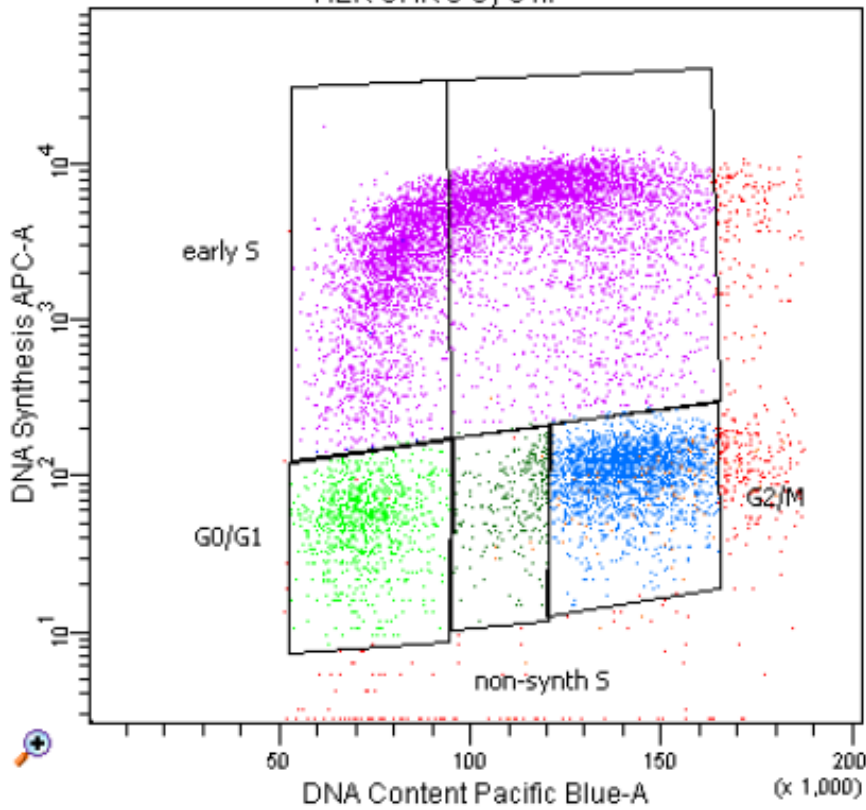

HEK CHK 3 Gy 6 hr

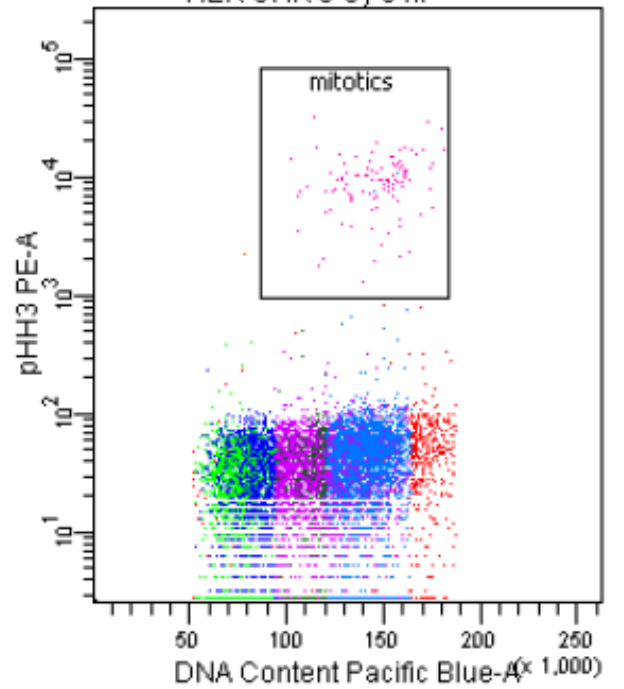



HEK NS 0 Gy 8 hr

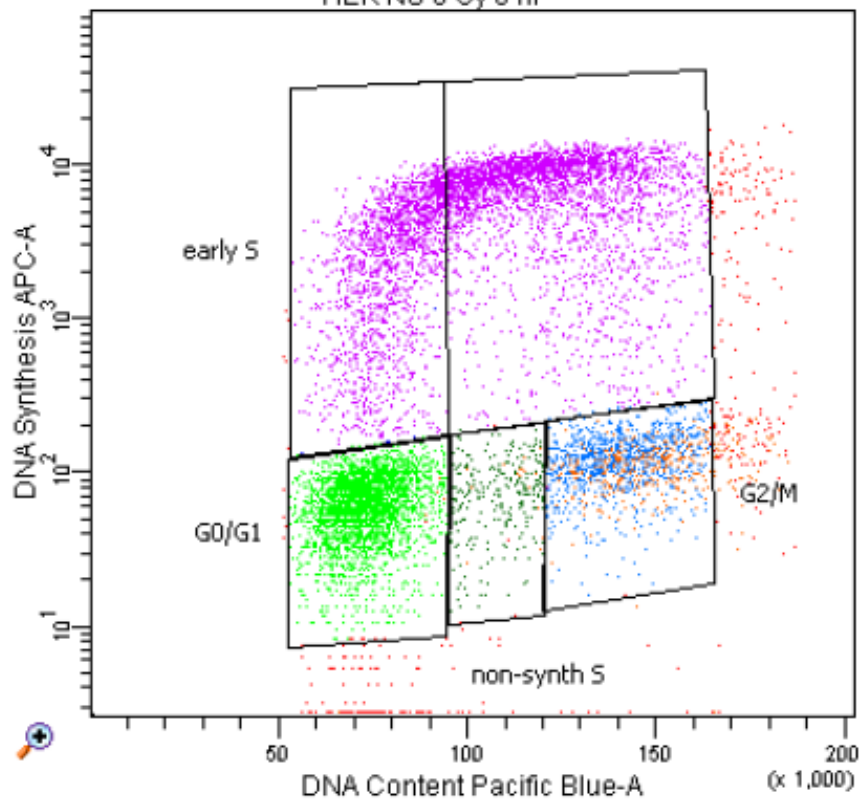

HEK NS 0 Gy 8 hr

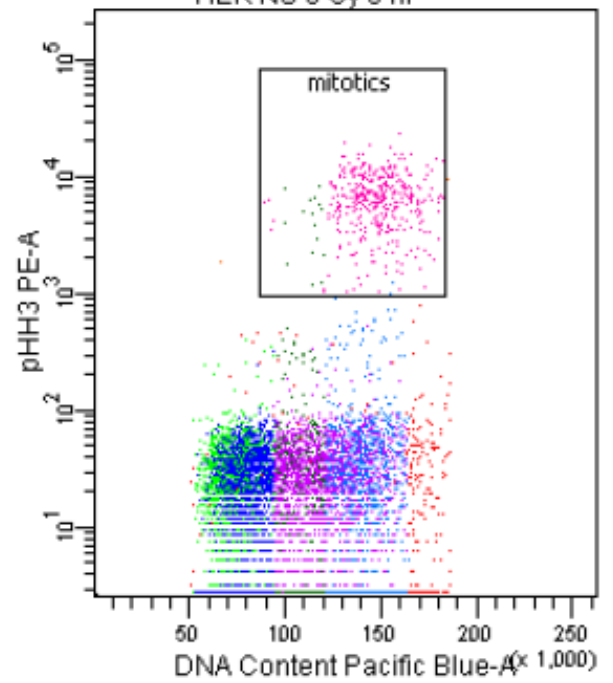

HEK NS 3 Gy 8 hr

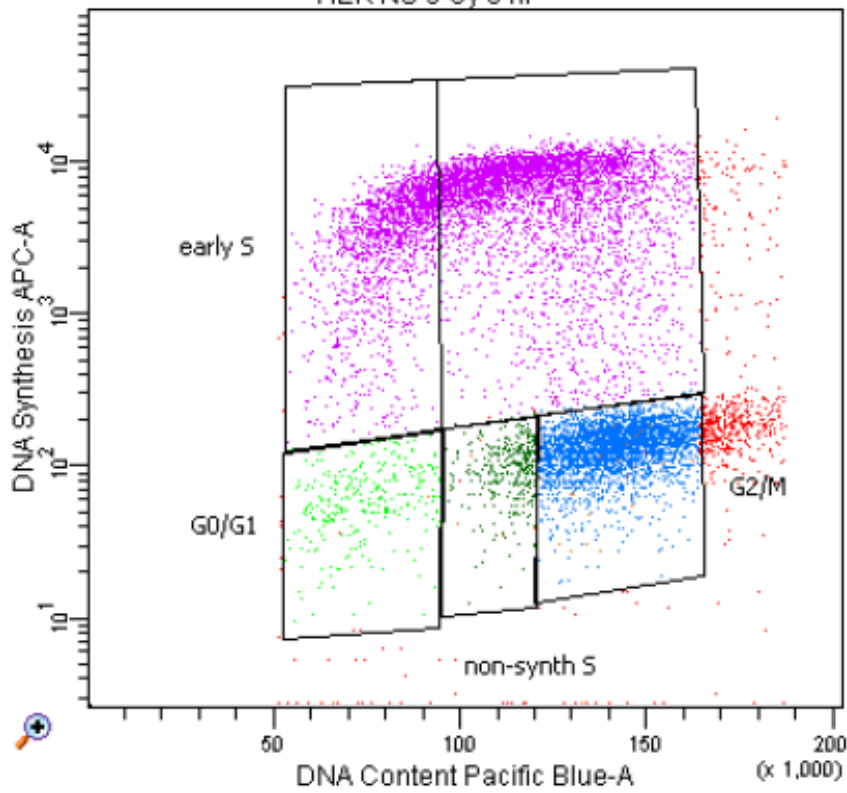

HEK NS 3 Gy 8 hr

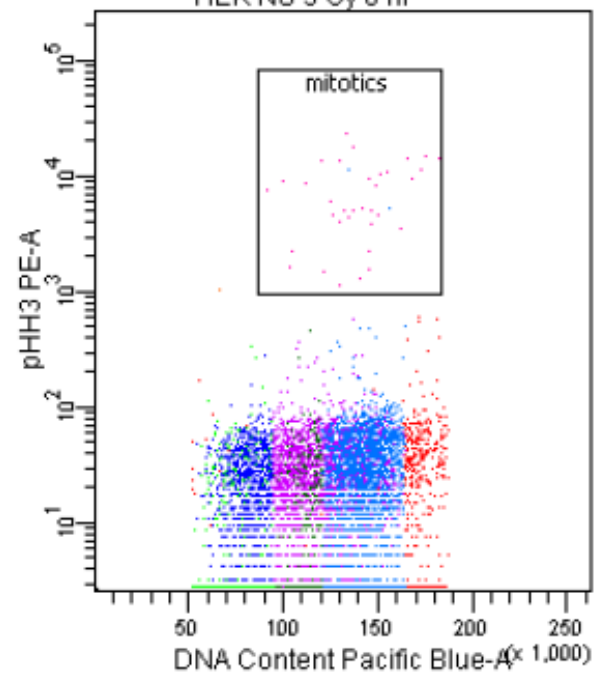

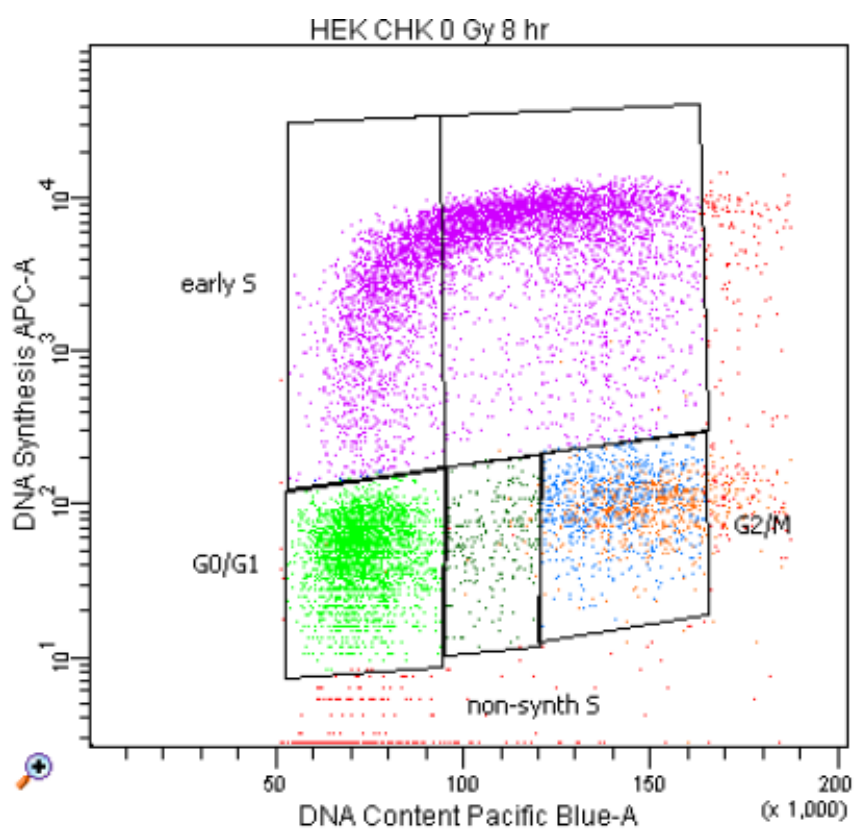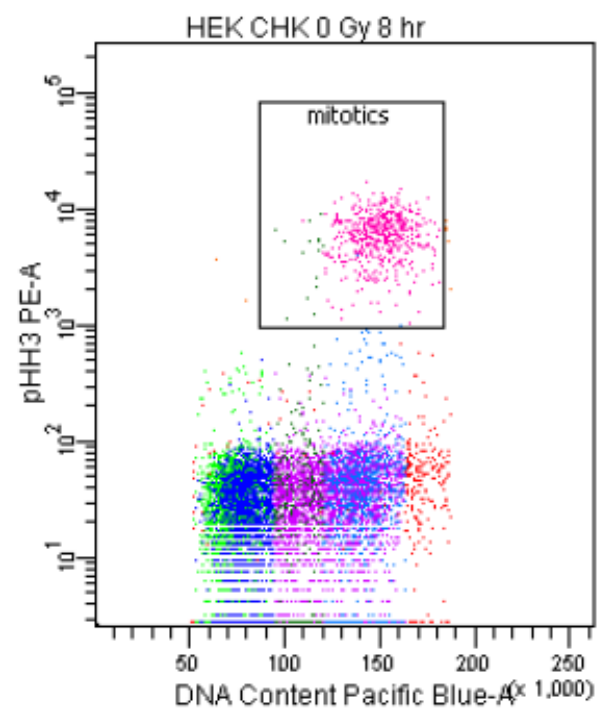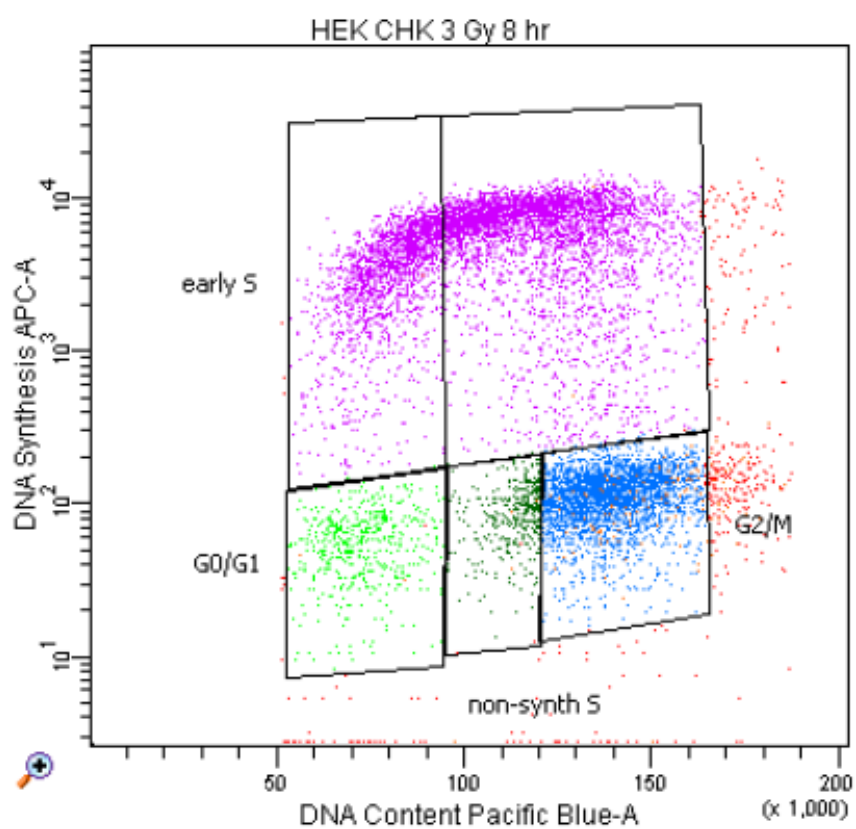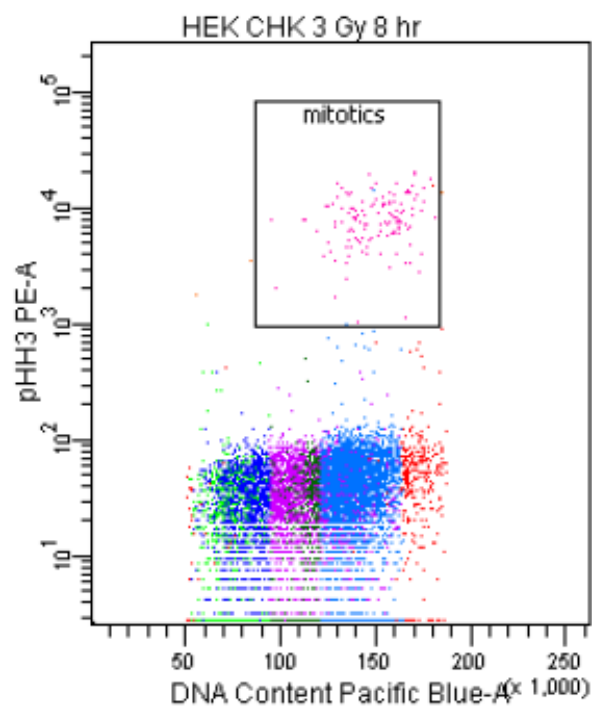

# Supplemental Figure 1.

A.

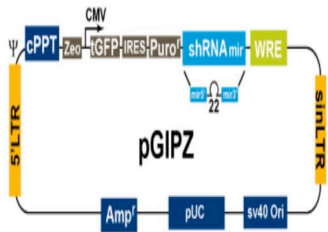

B.

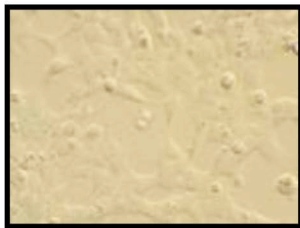

C.

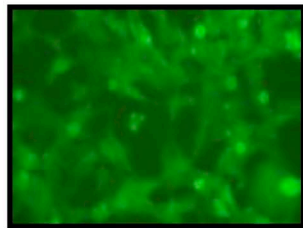

A. pGIPZ plasmid structure (Open BioSystems).

B. Image of HEK293 cells transduced with lentiviral particles (bright field)

C. Turbo GFP expression in lentivirally transduced HEK293 cells.

Note: Panels B and C are pictures of the same field of cells.

# Supplemental Figure 2.

A.

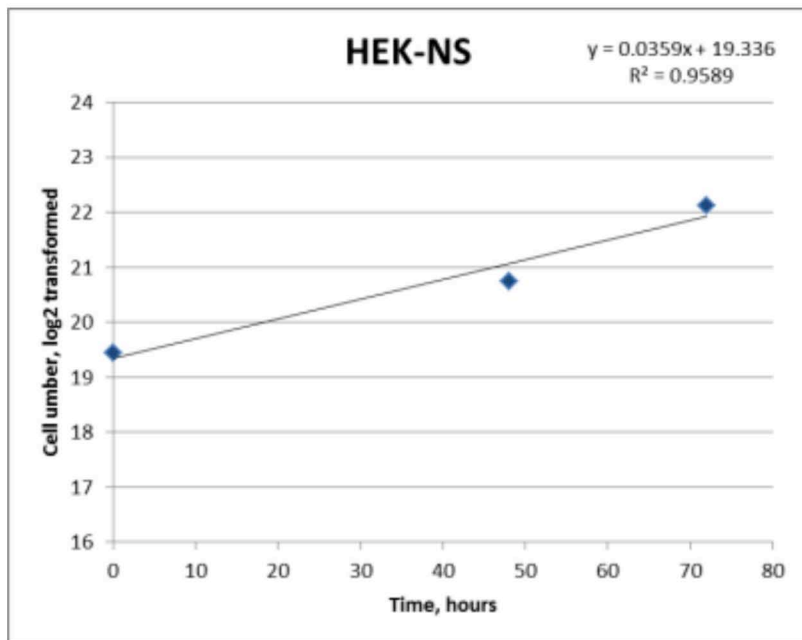

Extrapolated doubling time:  
 $1/\text{slope} = 1/0.0359 = 27.85$  hours

B.

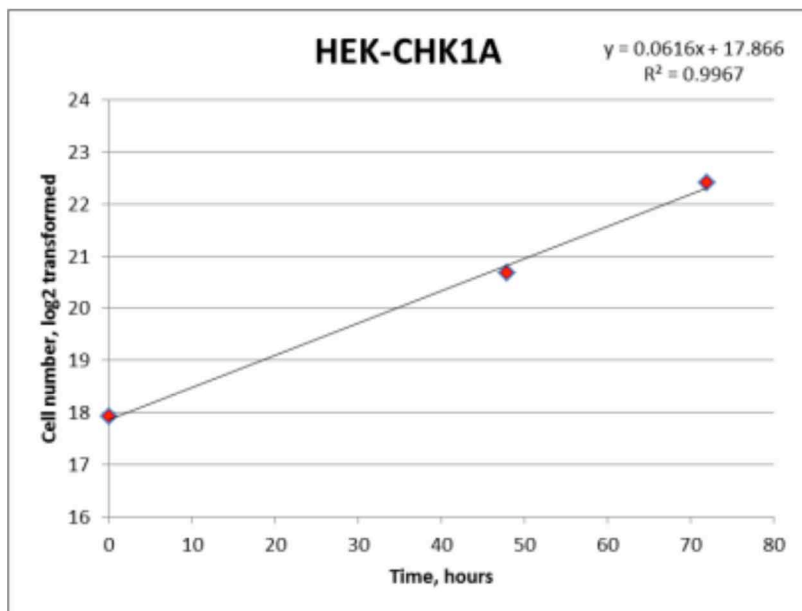

Extrapolated doubling time:  
 $1/\text{slope} = 1/0.0616 = 16.23$  hours

## Growth curves for HEK-NS and HEK-CHK1A stable cell lines.

Average cell numbers for each time point were log transformed to establish the linear growth range. For time-points in the linear growth range, data were log<sub>2</sub> transformed, plotted, and fitted with a linear trendline. The doubling time is the inverse of the slope ( $y = ax + b$ ).

### Supplemental Figure 3.

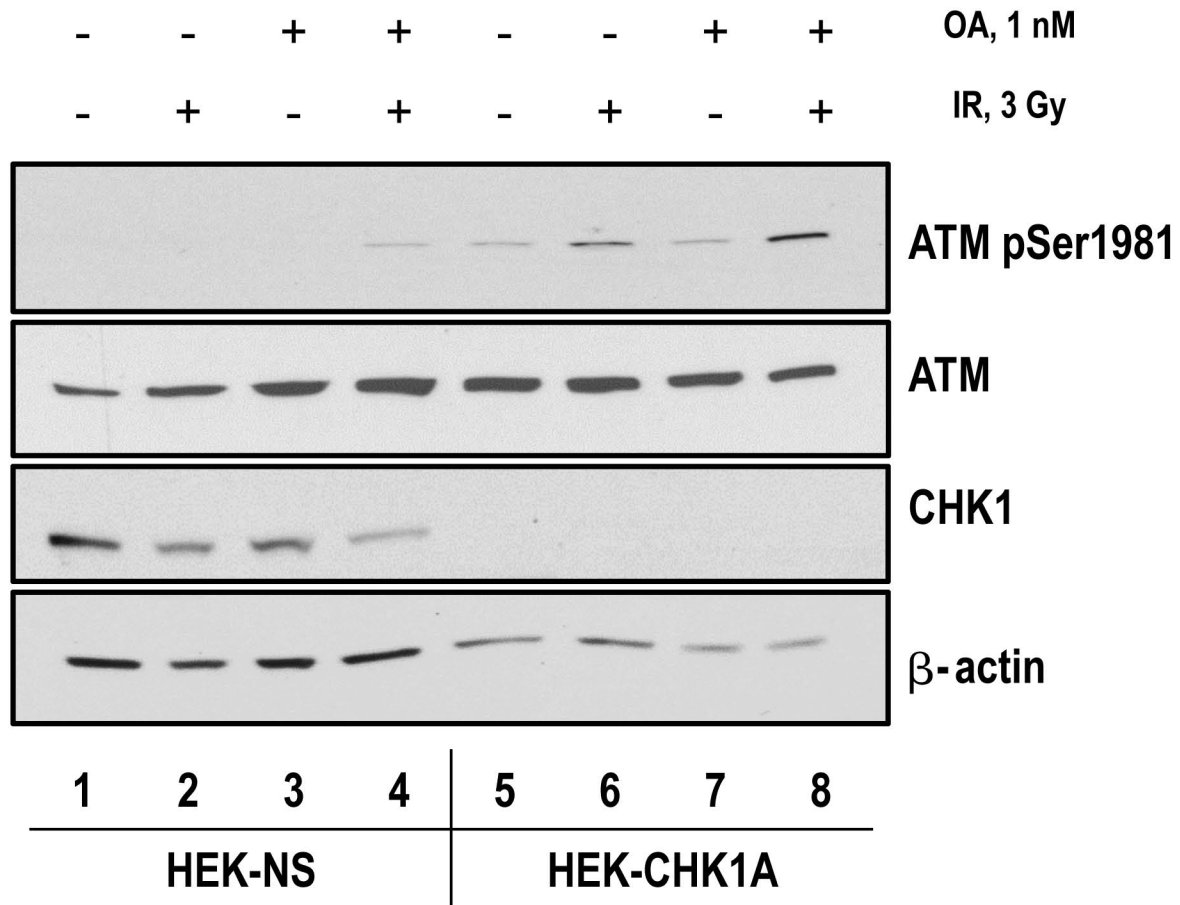

The cells were treated with either vehicle or okadaic acid (1 nM) following irradiation at 3 Gy. The samples were collected at 24 hours post irradiation and analyzed by Western blot.



## Supplemental Figure 4.

**Growth curves for HME-CC stable cell lines.** Average cell numbers for each time point were log transformed to establish the linear growth range. For time-points in the linear growth range, data were log<sub>2</sub> transformed, plotted, and fitted with a linear trendline. The doubling time is the inverse of the slope ( $y = ax + b$ ). Time 0 point represents the average number of cells prior to irradiation, which was set to 1 ( $\log_2(1) = 0$ ). **(A)**. Control cell line, LacZ-NS. **(B)**. ATM-NS, ATM-deficient cell line. **(C)**. LacZ-CHK1A, CHK1-deficient cell line. **(D)**. Double-deficient cell line, ATM-CHK1A.

**A.**

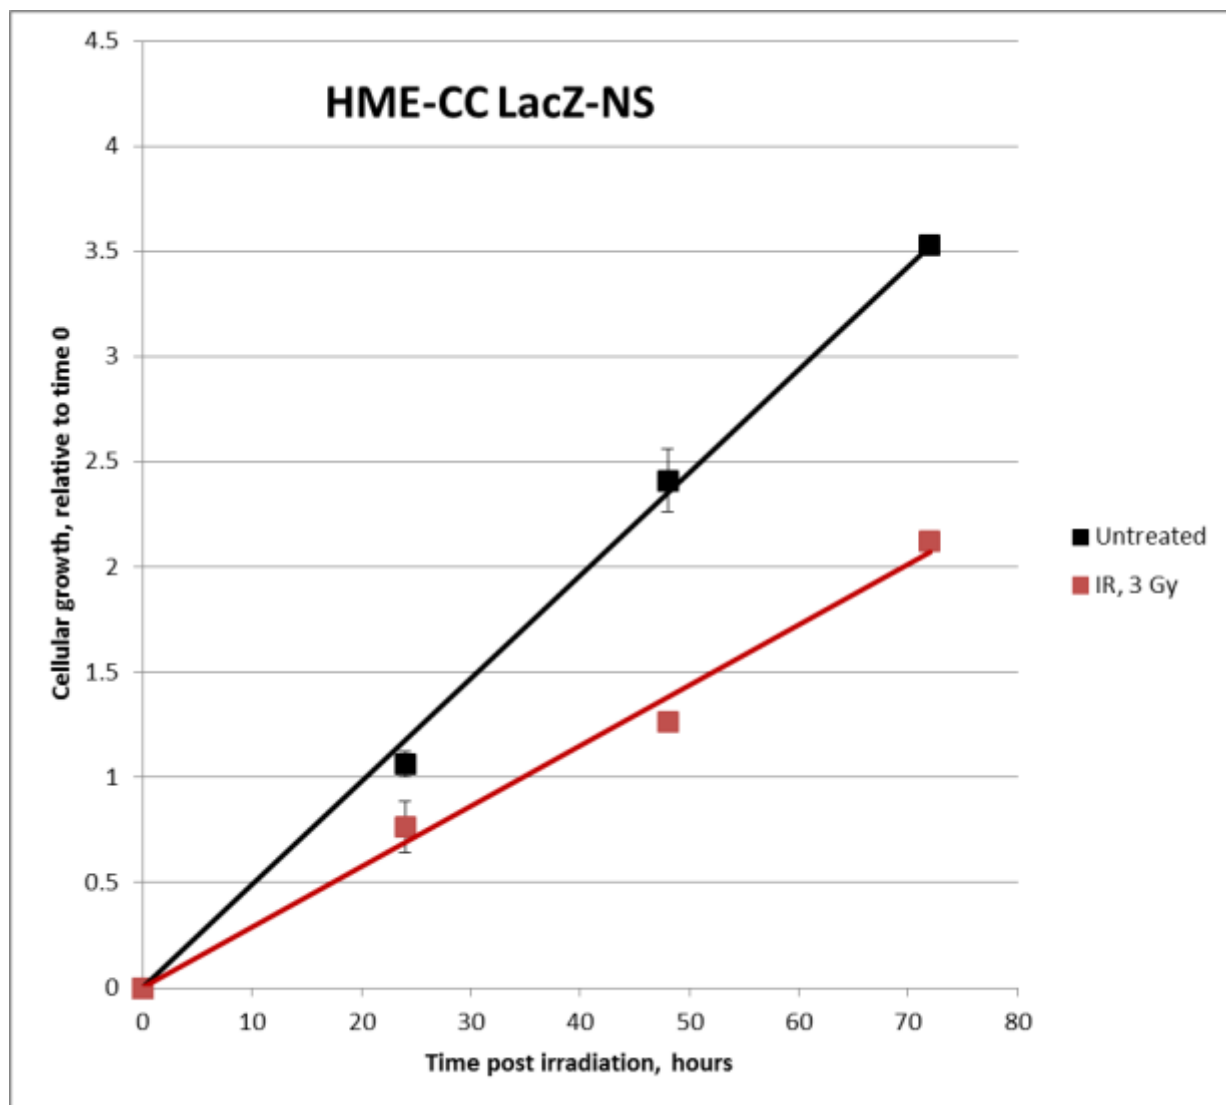

| Condition | Equation      | R <sup>2</sup> | Doubling time, hours |
|-----------|---------------|----------------|----------------------|
| Untreated | $y = 0.049x$  | 0.9977         | 20.4                 |
| IR, 3 Gy  | $y = 0.0287x$ | 0.9907         | 34.8                 |

# Supplemental Figure 4.

B.

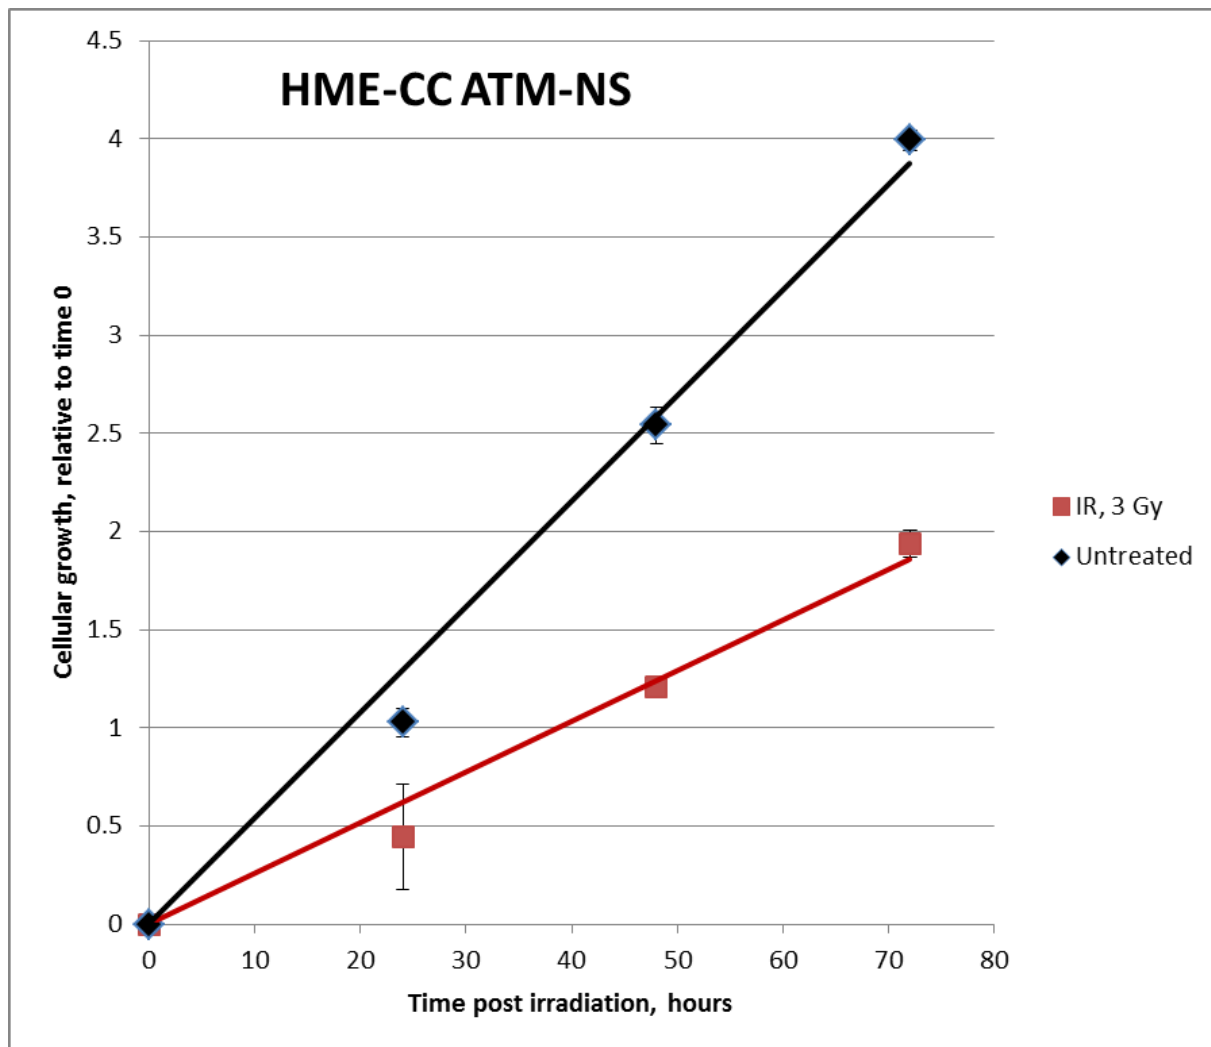

| Condition | Equation      | R <sup>2</sup> | Doubling time, hours |
|-----------|---------------|----------------|----------------------|
| Untreated | $y = 0.0538x$ | 0.9906         | 18.6                 |
| IR, 3 Gy  | $y = 0.0258x$ | 0.9826         | 38.8                 |

# Supplemental Figure 4.

C.

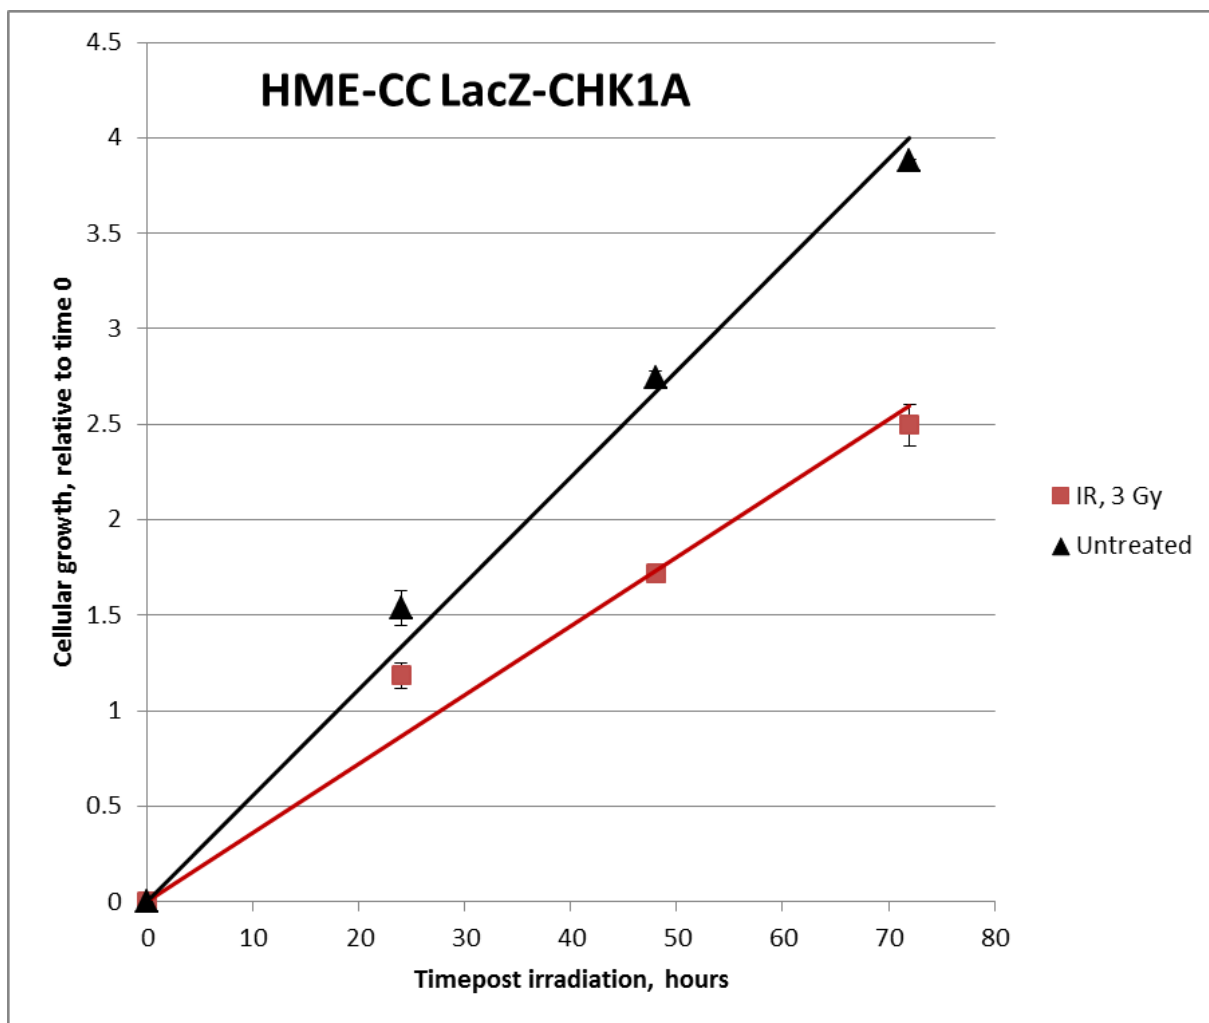

| Condition | Equation      | R <sup>2</sup> | Doubling time, hours |
|-----------|---------------|----------------|----------------------|
| Untreated | $y = 0.0556x$ | 0.9925         | 18.0                 |
| IR, 3 Gy  | $y = 0.0361x$ | 0.9664         | 27.7                 |

# Supplemental Figure 4.

D.

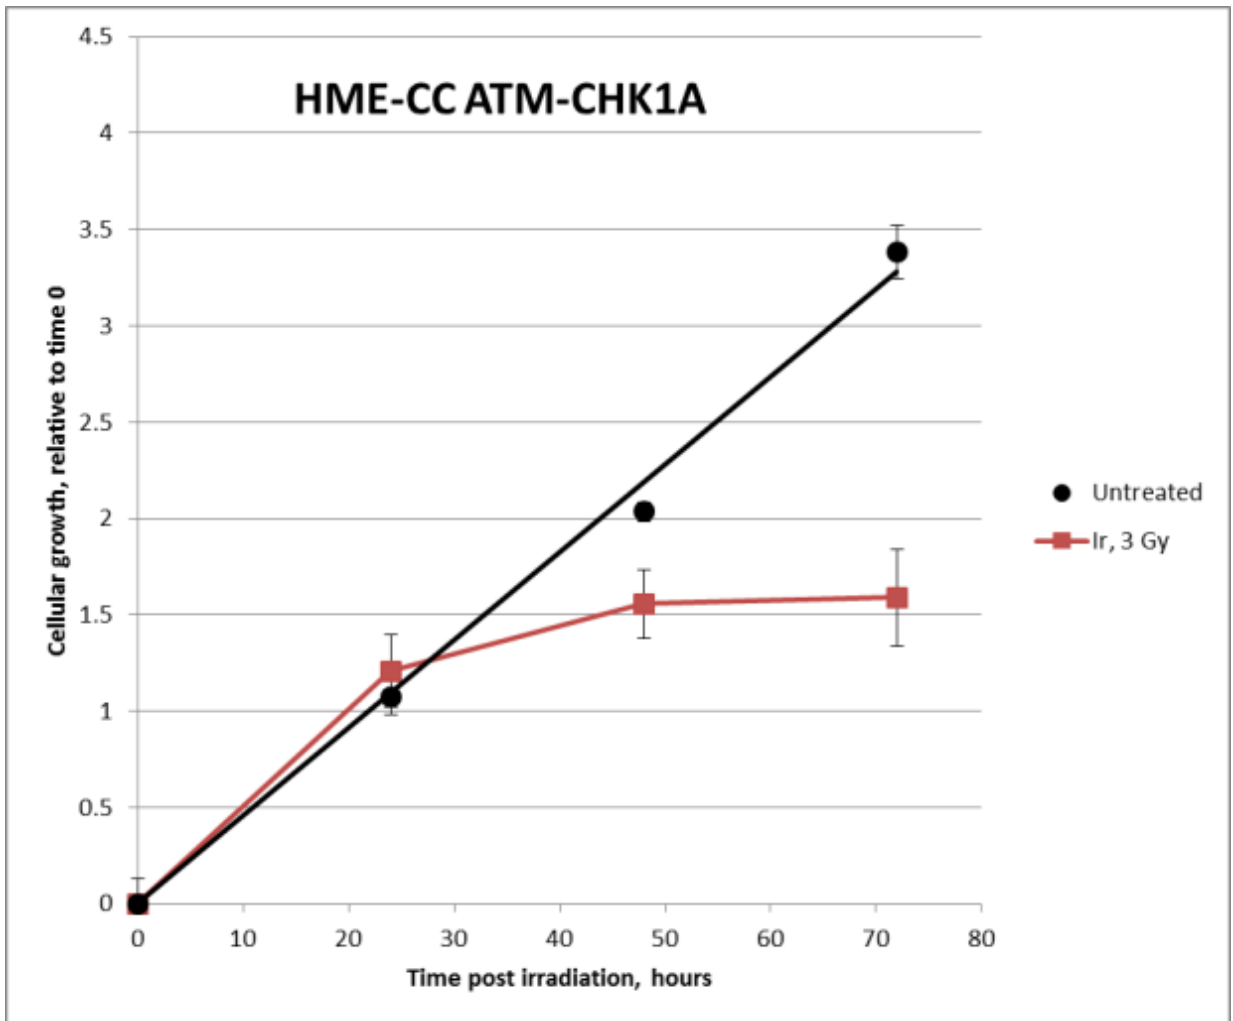

| Condition | Equation                          | R <sup>2</sup> | Doubling time, hours |
|-----------|-----------------------------------|----------------|----------------------|
| Untreated | $y = 0.0556x$                     | 0.9925         | 22.0                 |
| IR, 3 Gy  | $y = -0.003x^2 + 0.0341x + 0.546$ | 1.0            | N/A                  |

Note: In the case of the double-deficient mutant, for the first 24 hours post IR, growth is linear and does not differ from the control condition; if extrapolated from the subsequent time-points (48 h and 72 h), the doubling time would equal 125 hours.

**Supplementary Table 1 (Raw data for Figure 3A). Measured percentages of cells in mitosis in control and following irradiation (3 Gy) at the indicated time points.**

| Biological replicate | HEK-NS cell line         |      |      |      |                  |      |      |      |
|----------------------|--------------------------|------|------|------|------------------|------|------|------|
|                      | Non-irradiated (control) |      |      |      | Irradiated, 3 Gy |      |      |      |
|                      | 2 h                      | 4 h  | 6 h  | 8 h  | 2 h              | 4 h  | 6 h  | 8 h  |
| Set 1                | 3.2                      | 4.0  | 3.3  | -    | 0.4              | 0.4  | 0.3  | -    |
| Set 2                | 3.4                      | 4.4  | 3.8  | 3.7  | 0.3              | 0.4  | 0.2  | 0.3  |
| Set 3                | 2.7                      | 3.8  | 4.0  | 3.6  | 0.2              | 0.1  | 0.2  | 0.3  |
| Set 4                | 3.7                      | 3.8  | 3.9  | 4.0  | 0.5              | 0.3  | 0.3  | 0.3  |
| Set 5                | 4.2                      | 4.1  | -    | -    | 0.5              | 0.4  | -    | -    |
| Set 6                | 2.3                      | 2.5  | 2.8  | -    | 0.6              | 0.4  | 0.3  | -    |
| Set 7                | 3.1                      | 3.2  | 4.0  | -    | 0.4              | 0.2  | 0.3  | -    |
| Set 8                | 4.1                      | 4.0  | 4.7  | -    | 0.4              | 0.3  | 1.3  | -    |
| Set 9                | 2.4                      | 2.2  | 2.5  | -    | 0.6              | 0.3  | 0.4  | -    |
| Average              | 3.2                      | 3.6  | 3.6  | 3.8  | 0.4              | 0.3  | 0.4  | 0.3  |
| SEM                  | 0.23                     | 0.25 | 0.25 | 0.12 | 0.04             | 0.04 | 0.13 | 0.01 |
| Biological replicate | HEK-CHK1A cell line      |      |      |      |                  |      |      |      |
|                      | Non-irradiated (control) |      |      |      | Irradiated, 3 Gy |      |      |      |
|                      | 2 h                      | 4 h  | 6 h  | 8 h  | 2 h              | 4 h  | 6 h  | 8 h  |
| Set 1                | 2.7                      | 4.0  | 3.5  | -    | 0.8              | 1.1  | 1.2  | -    |
| Set 2                | 4.7                      | 5.0  | 5.0  | 5.0  | 0.4              | 0.9  | 1.2  | 1.5  |
| Set 3                | 3.2                      | 3.8  | 5.0  | 4.6  | 0.5              | 0.6  | 1.5  | 1.7  |
| Set 4                | 4.6                      | 4.8  | 4.9  | 5.3  | 1.1              | 0.8  | 1.0  | 1.2  |
| Set 5                | 3.3                      | 4.5  | -    | -    | 1.2              | 1.4  | -    | -    |
| Set 6                | 4.0                      | 4.4  | -    | -    | 1.1              | 1.2  | -    | -    |
| Set 7                | 3.8                      | 4.6  | 4.5  | -    | 0.6              | 1.0  | 1.7  | -    |
| Set 8                | 4.5                      | 4.7  | 3.9  | -    | 0.6              | 1.1  | 0.5  | -    |
| Set 9                | 2.3                      | 2.4  | 3.8  | -    | 1.2              | 0.9  | 1.2  | -    |
| Average              | 3.7                      | 4.2  | 4.4  | 5.0  | 0.8              | 1.0  | 1.2  | 1.5  |
| SEM                  | 0.29                     | 0.26 | 0.24 | 0.20 | 0.11             | 0.08 | 0.13 | 0.15 |



**Supplementary Table 2. Quantification of Western blot data from Figure 5B.**

| Lane # | Condition            | Band densitometry |         |         |         | Normalized to total CHK1 protein |         |         | Expressed as fold change relative to untreated CHK1-proficient control (lane 1) |         |         |
|--------|----------------------|-------------------|---------|---------|---------|----------------------------------|---------|---------|---------------------------------------------------------------------------------|---------|---------|
|        |                      | CHK1 total        | pSer345 | pSer317 | pSer296 | pSer345                          | pSer317 | pSer296 | pSer345                                                                         | pSer317 | pSer296 |
| Lane 1 | HEK-NS Control       | 158158            | 146939  | 55636   | 123088  | 0.93                             | 0.35    | 0.78    | 1.0                                                                             | 1.0     | 1.0     |
| Lane 2 | HEK-NS Irradiated    | 123816            | 205978  | 188371  | 88182   | 1.66                             | 1.52    | 0.71    | 1.8                                                                             | 4.3     | 0.9     |
| Lane 3 | HEK-CHK1A Control    | 5811              | 233118  | 6279    | 4055    | 40.12                            | 1.08    | 0.70    | 43.2                                                                            | 3.1     | 0.9     |
| Lane 4 | HEK-CHK1A Irradiated | 1342              | 246094  | 38908   | 66258   | 183.38                           | 28.99   | 49.37   | 197.4                                                                           | 82.4    | 63.4    |
